# Supplementary material
Source: PubMed Central journal article supplement (PMC4975035)
Supplement: NIHMS806167-supplement-Supplemental_Information.pdf [file NIHMS806167-supplement-Supplemental_Information.pdf]

## Supporting Information for

### **Cell Adhesion Proteins Modulate the Carbon Nanotube Optical Bandgap *via* Surface Charge Accumulation**

*Daniel Roxbury<sup>1</sup>, Prakrit V. Jena<sup>1</sup>, Yosi Shamay<sup>1</sup>, Christopher P. Horoszkó<sup>1,2</sup>, and Daniel A. Heller<sup>1,2\*</sup>*

<sup>1</sup>Memorial Sloan-Kettering Cancer Center, New York, NY, USA.

<sup>2</sup>Weill Cornell Medical College, New York, NY, USA.

## **Supporting Figures**

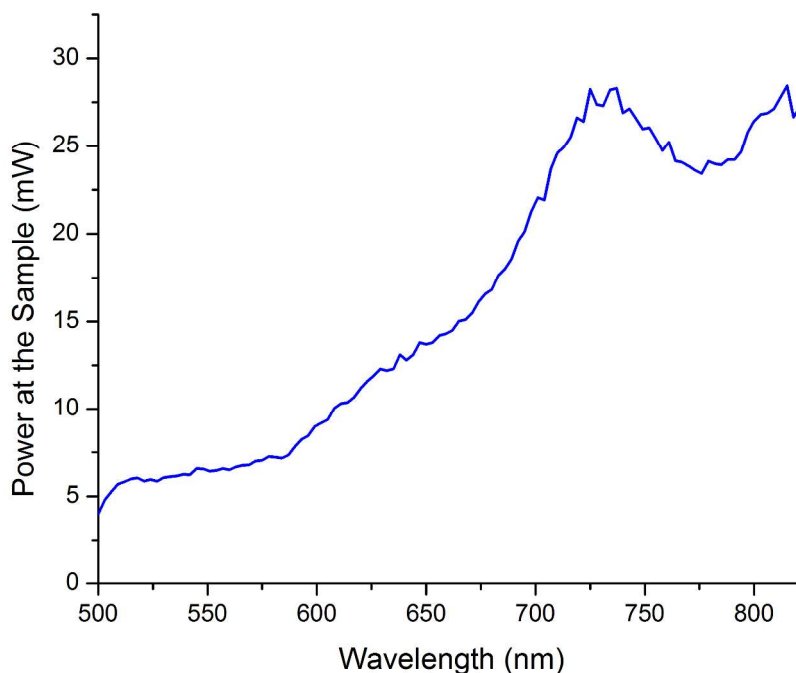

**Figure S1.** Excitation power measured through a 50x objective at the location of the sample.

To correct for wavelength-dependent variations in excitation efficiency of the supercontinuum laser/bandpass filter, the excitation power was measured at the sample (ThorLabs PM100D power meter). The excitation power calibration curve is shown in Figure S1. The measured power values were used to apply a correction factor at each excitation wavelength between 500 and 827 nm (20 nm bandwidth, 3 nm steps).

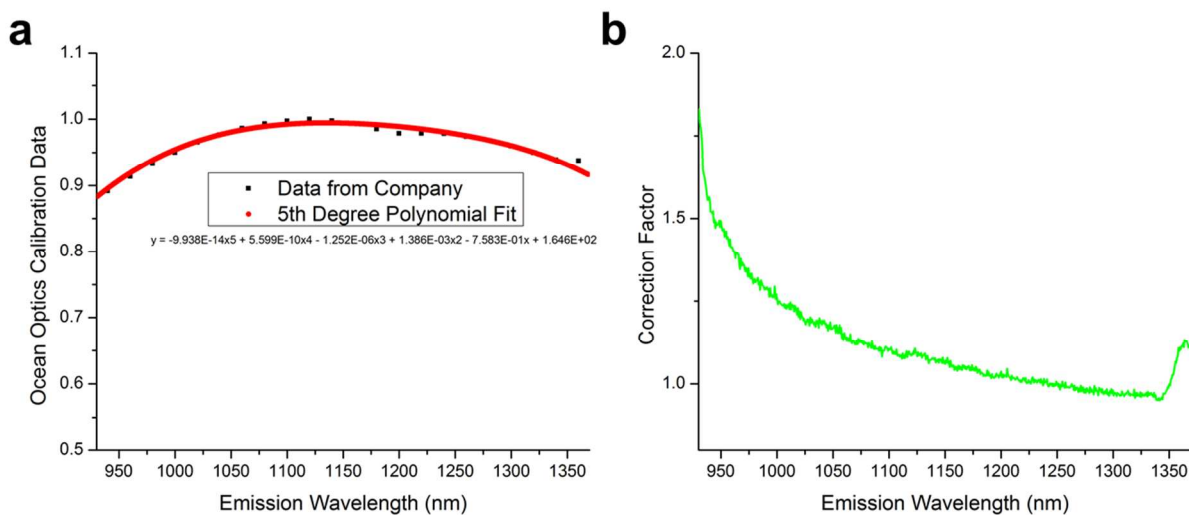

**Figure S2.** Emission intensity calibration. (a) Halogen calibration light source data provided by the manufacturer and 5<sup>th</sup> degree polynomial least-squares fit. (b) Emission calibration curve collected through a 50x objective.

An HL-3-CAL-EXT halogen calibration light source (Ocean Optics) was used to correct for wavelength-dependent grating, detector, and lenses/mirror efficiencies. Calibration data provided by the lamp manufacturer was fit to a 5<sup>th</sup> degree polynomial over the range of emission wavelengths used in the experiments (Figure S2). An Hg/Ne lamp (Newport) was used to calibrate spectrometer wavelength in the 930-1370 nm range.<sup>1</sup>

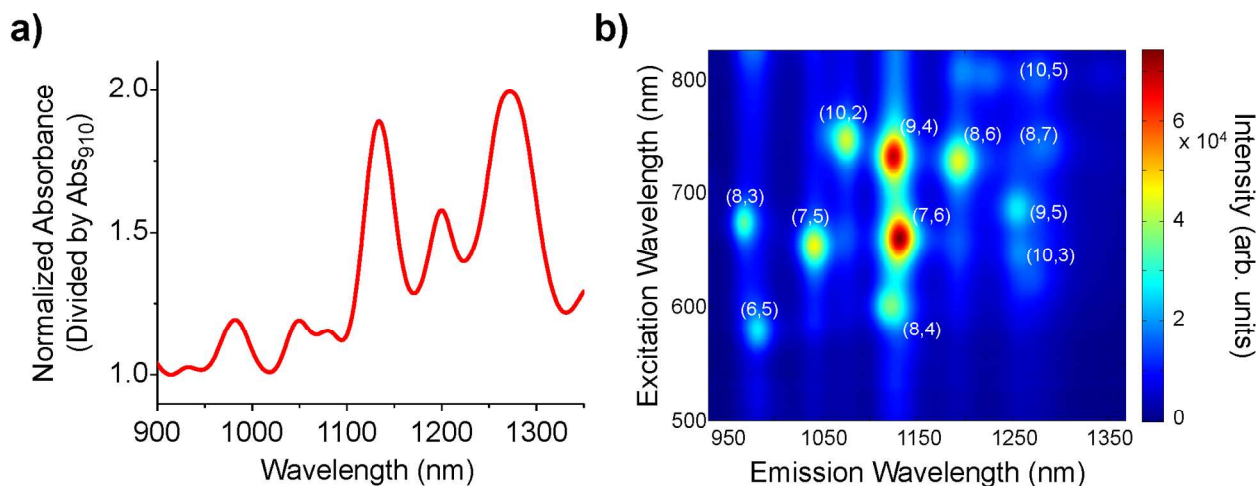

**Figure S3.** Spectroscopic characterization of the ss(AT)<sub>15</sub>-HiPco nanotube complex. (a) Absorbance scan of ss(AT)<sub>15</sub>-HiPco nanotube complexes diluted in cellular media without serum. The data has been normalized at 910 nm. (b) Photoluminescence plot of ss(AT)<sub>15</sub>-HiPco complexes diluted in cell media without serum. Nanotube (n,m) species (chiralities) are labeled.

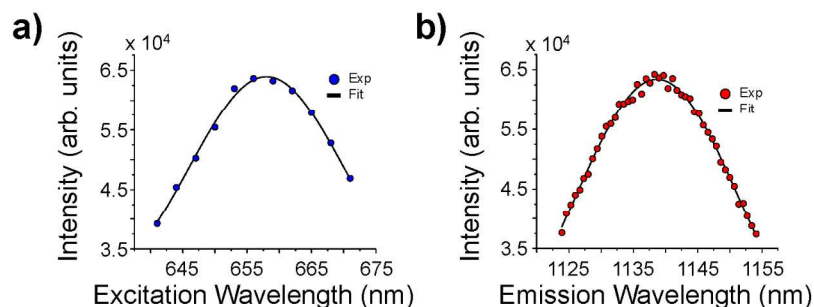

**Figure S4.** Sample Gaussian fits of nanotube photoluminescence spectra. (a) Excitation spectrum of the (7,6)-nanotube extracted from the two-dimensional photoluminescence plot of ss(AT)<sub>15</sub>-HiPco nanotubes. The line is a Gaussian fit of the form:  $\text{Intensity} = \text{Intensity}_0 + \text{Area} \cdot \exp(-0.5 \cdot ((\lambda - \lambda_c) / w)^2)$  (b) Emission spectrum and Gaussian fit of the same (7,6) nanotube.

To extract  $\lambda_{11}$  and  $\lambda_{22}$  values for 12 observed nanotube (n,m) species from excitation/emission spectra, code was written to use initial guesses of the excitation and emission maxima. Individual peaks were sequentially fit with Gaussian lineshapes using a least-squares algorithm to ascertain the center excitation and emission wavelengths.

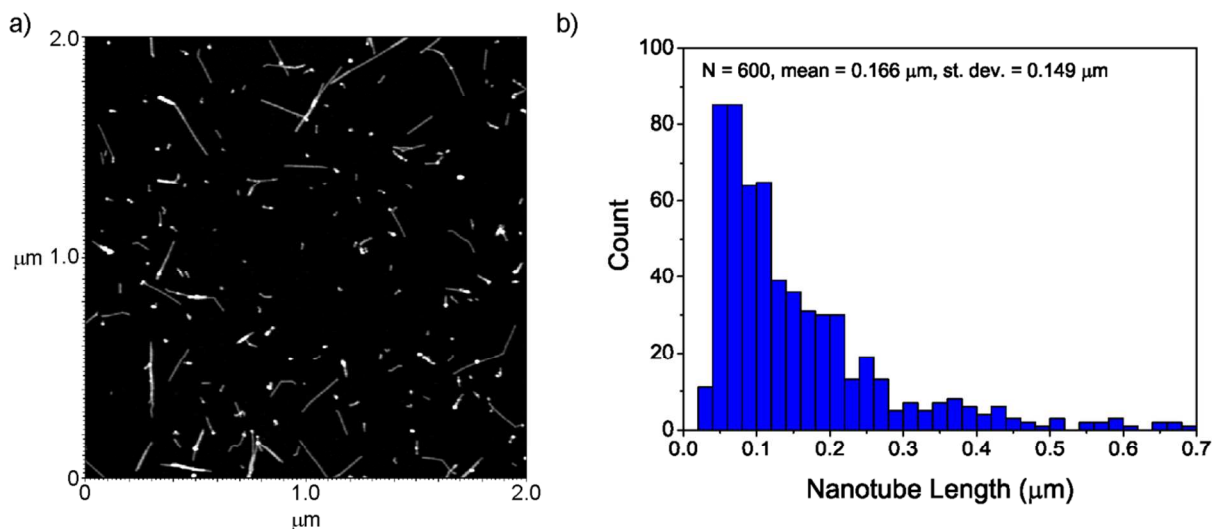

**Figure S5.** Length characterization of nanotubes by atomic force microscopy. (a) Representative micrograph of the ss(AT)<sub>15</sub>-HiPco sample deposited onto a freshly-cleaved mica surface. (b) Length distribution histogram incorporating length information from 600 nanotubes. Bin size equals 0.02 μm.

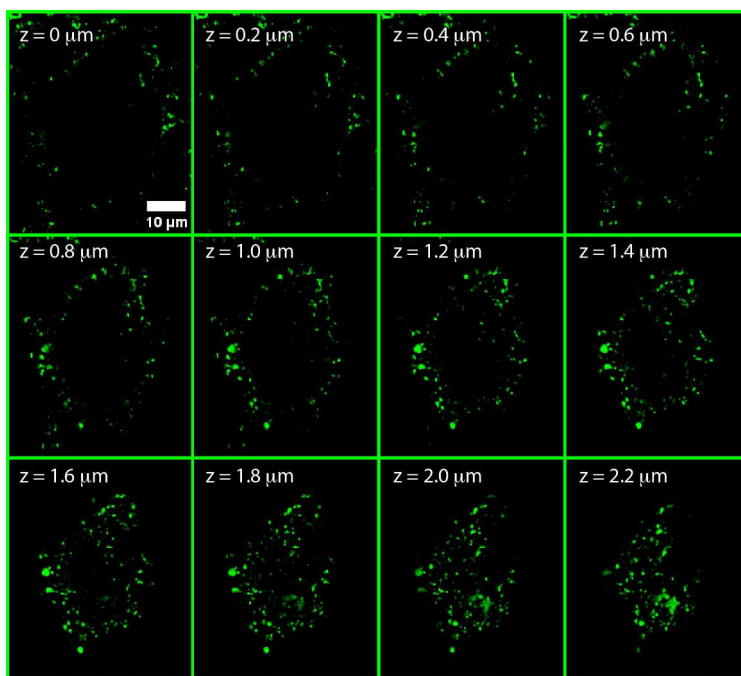

**Figure S6.** Deconvolved nIR broadband fluorescence images (900-1600 nm) of increasing height from the culture dish surface acquired from a HeLa cell incubated with 5 mg/L ss(AT)<sub>15</sub>-HiPco nanotubes for 5 minutes.

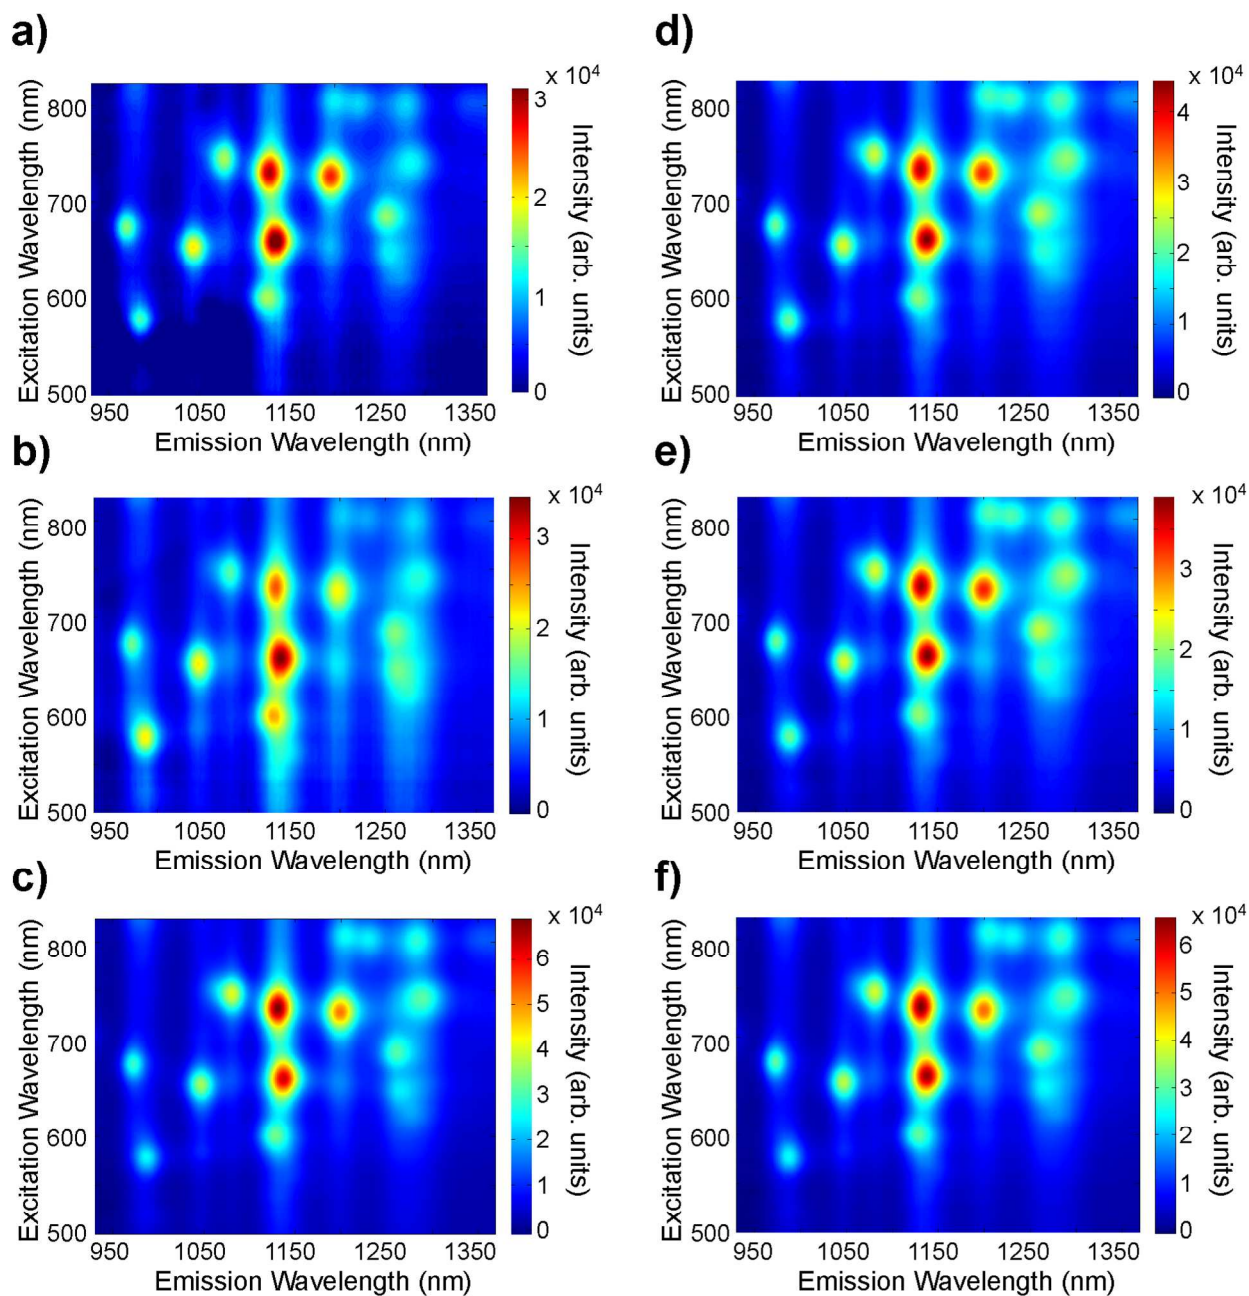

**Figure S7.** Photoluminescence plots of ss(AT)<sub>15</sub>-HiPco nanotube complexes on cell membranes before and after trypsinization. (a) Representative data from ss(AT)<sub>15</sub>-HiPco nanotubes on the surface of adherent HeLa cells, (b) adherent NIH/3T3 cells, (c) Jurkat cells in a native suspension state. (d) Representative data from ss(AT)<sub>15</sub>-HiPco nanotubes on the surface of trypsinized HeLa cells, (b) on trypsinized NIH/3T3 cells, and (c) on trypsinized Jurkat cells.

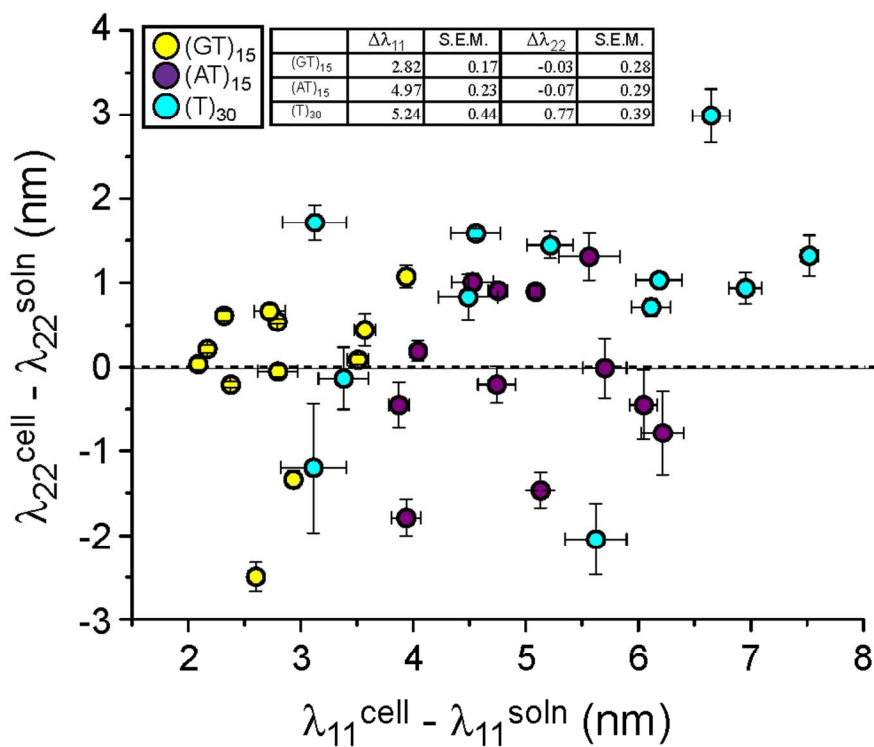

**Figure S8.** Photoluminescence responses of ss(GT)<sub>15</sub>, ss(AT)<sub>15</sub>, and ss(T)<sub>30</sub>-HiPco nanotube complexes to the native NIH/3T3 cell surface. The fitted emission peak wavelengths are plotted relative to values from nanotube complexes in solution (cell media without serum, denoted soln). Error bars represent S.E.M., n=5.

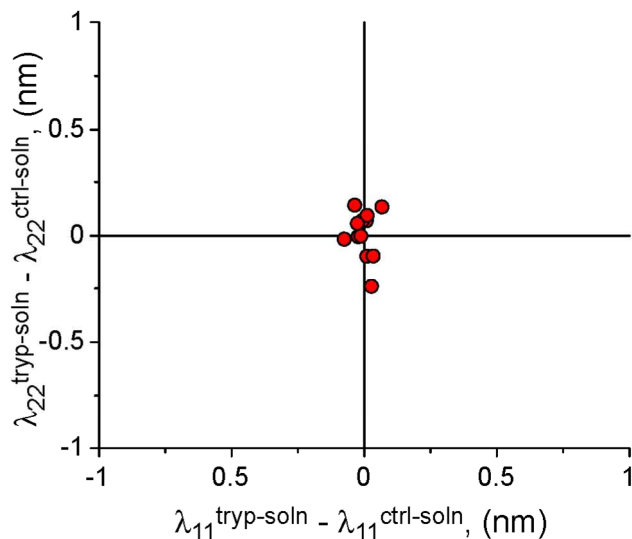

**Figure S9.** Control experiment to assess nanotube response to trypsin in solution. Fitted center excitation and emission wavelengths from ss(AT)<sub>15</sub>-HiPco in cell culture media containing trypsin (10% of stock) minus control (cell culture media without trypsin).

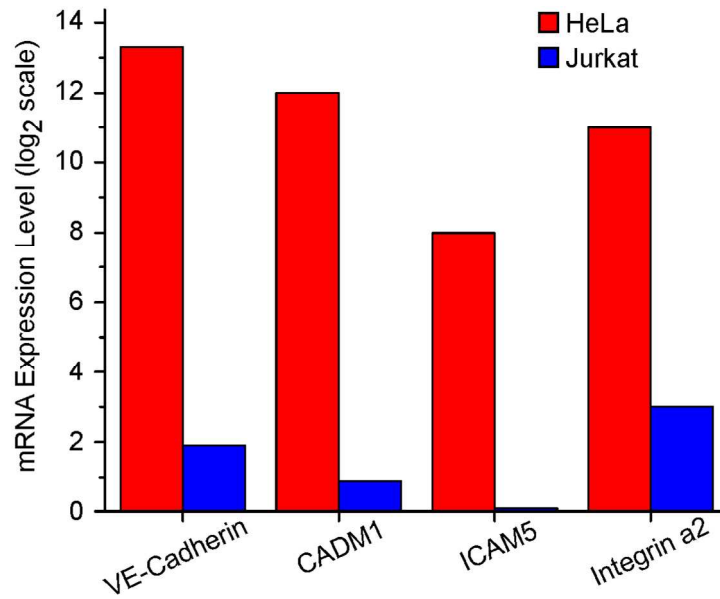

**Figure S10.** mRNA expression levels of adhesion molecules on HeLa and Jurkat cells, from the Broad-Novartis Cancer Cell Line Encyclopedia.

The Broad-Novartis Cancer Cell Line Encyclopedia is a compilation of gene expression data from 947 human cancer cell lines.<sup>2</sup> As HeLa and Jurkat cell lines are derived from human patient samples, mRNA expression levels for these two cell types are included in the encyclopedia. Comparing four types of cellular adhesion proteins, it is clear that HeLa cell expression of these proteins is much higher than Jurkat cells.

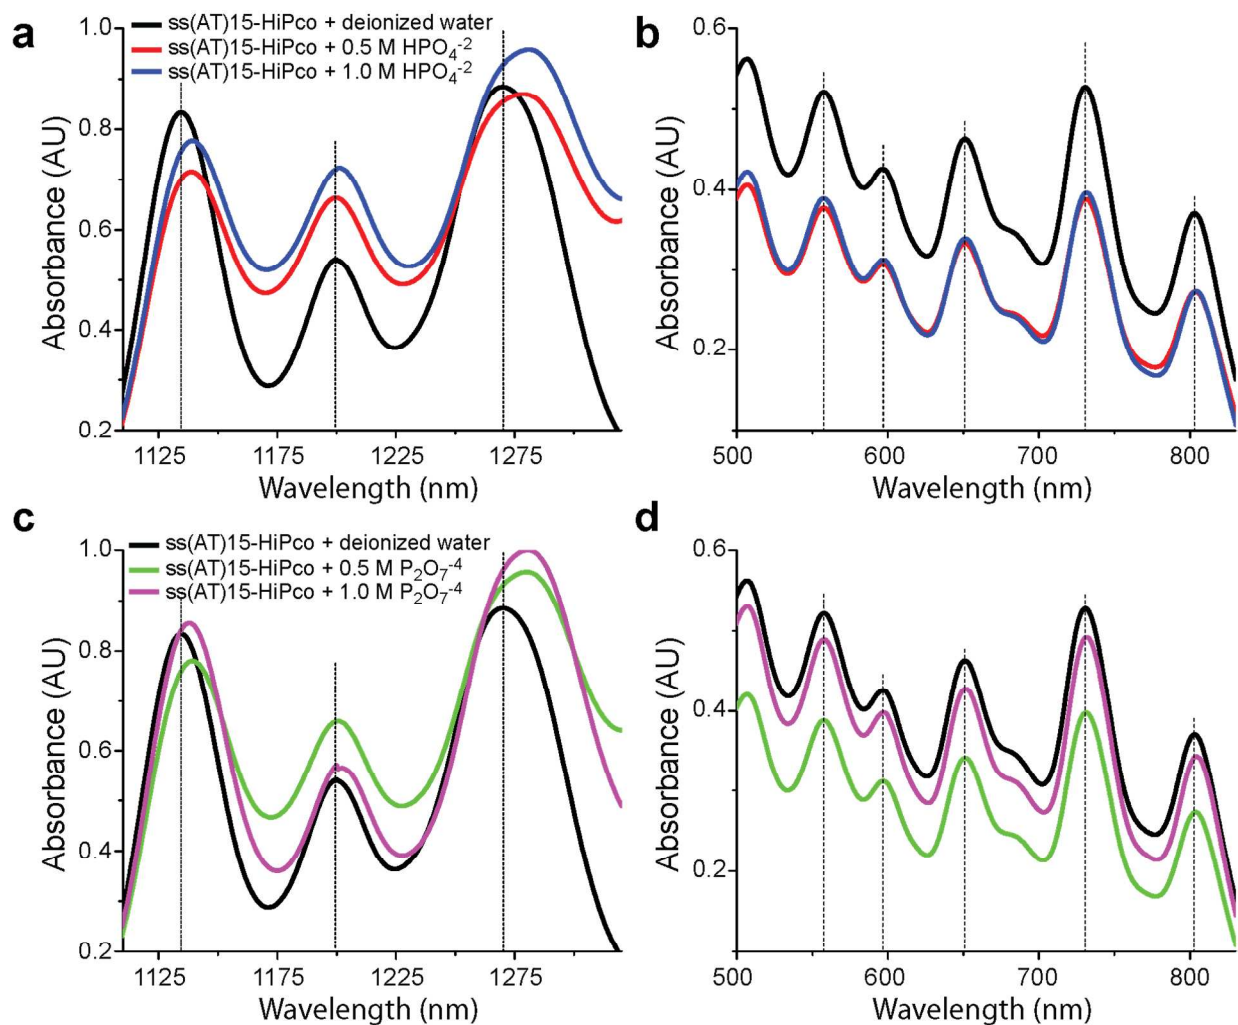

**Figure S11.** Absorbance spectra of ss(AT)<sub>15</sub>-HiPco nanotube spectra in phosphate solutions. (a) Monophosphates, at 0.5 or 1 M, red-shifted nanotube  $\lambda_{11}$  absorbance bands. Black vertical lines are for visual reference to the sample in deionized water. (b)  $\lambda_{22}$  absorbance bands showed little or no response to added monophosphates. (c) Pyrophosphates, at 0.5 or 1 M, also shifted nanotube  $\lambda_{11}$  absorbance bands. (d)  $\lambda_{22}$  absorbance bands again showed little or no response to added pyrophosphates.



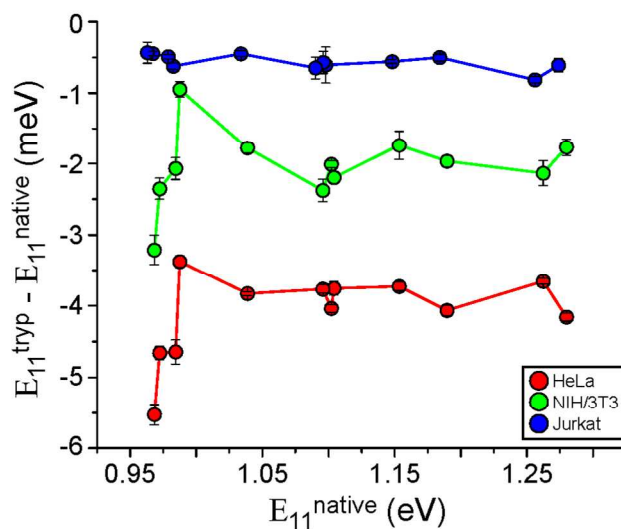

**Figure S12.** Scatter plot between nanotube emission energy change (between trypsinized and native states,  $E_{11, \text{tryp}} - E_{11, \text{native}}$ ) versus nanotube emission energy for HeLa, NIH/3T3, and Jurkat cells.

**Table S1.** Fitted  $\lambda_{11}$  and  $\lambda_{22}$  values, along with goodness of fit values (adjusted  $R^2$ ), as a function of chirality, for ss(AT)<sub>15</sub>-HiPco nanotubes in cell culture media without serum.

| Chirality (n,m) | $\lambda_{11}$ (nm) | Fit $R^2$ | $\lambda_{22}$ (nm) | Fit $R^2$ |
|-----------------|---------------------|-----------|---------------------|-----------|
| (8,3)           | 968.78              | 0.988     | 673.22              | 0.999     |
| (6,5)           | 982.36              | 0.989     | 579.55              | 0.995     |
| (7,5)           | 1042.29             | 0.994     | 652.87              | 0.994     |
| (10,2)          | 1074.94             | 0.984     | 745.14              | 0.999     |
| (8,4)           | 1123.04             | 0.976     | 601.04              | 0.989     |
| (9,4)           | 1125.14             | 0.998     | 730.62              | 0.998     |
| (7,6)           | 1131.60             | 0.996     | 659.72              | 0.997     |
| (8,6)           | 1193.74             | 0.997     | 726.66              | 0.999     |
| (9,5)           | 1255.68             | 0.979     | 684.72              | 0.997     |
| (10,3)          | 1259.48             | 0.938     | 648.65              | 0.945     |
| (10,5)          | 1275.28             | 0.944     | 800.09              | 0.989     |
| (8,7)           | 1280.43             | 0.955     | 739.92              | 0.988     |

**Table S2.** Fitted  $\lambda_{11}$  and  $\lambda_{22}$  values, along with goodness of fit values (adjusted  $R^2$ ), as a function of chirality, for ss(AT)<sub>15</sub>-HiPco nanotubes on the surface of adherent HeLa cells. Note,  $\lambda_{22}$  values for the (10,3) nanotube have been omitted from plots and calculations due to bad goodness of fits.

| Chirality (n,m) | $\lambda_{11}$ (nm) 1 | Fit $R^2$ 1 | $\lambda_{22}$ (nm) 1 | Fit $R^2$ 1 | $\lambda_{11}$ (nm) 2 | Fit $R^2$ 2 | $\lambda_{22}$ (nm) 2 | Fit $R^2$ 2 | $\lambda_{11}$ (nm) 3 | Fit $R^2$ 3 | $\lambda_{22}$ (nm) 3 | Fit $R^2$ 3 |
|-----------------|-----------------------|-------------|-----------------------|-------------|-----------------------|-------------|-----------------------|-------------|-----------------------|-------------|-----------------------|-------------|
| (8,3)           | 970.91                | 0.973       | 673.56                | 0.969       | 970.76                | 0.977       | 673.80                | 0.996       | 970.85                | 0.984       | 674.00                | 0.991       |
| (6,5)           | 985.09                | 0.923       | 580.53                | 0.954       | 985.05                | 0.964       | 579.41                | 0.952       | 984.97                | 0.961       | 579.02                | 0.980       |
| (7,5)           | 1044.29               | 0.978       | 652.82                | 0.985       | 1044.58               | 0.984       | 652.90                | 0.987       | 1044.65               | 0.984       | 652.88                | 0.975       |
| (10,2)          | 1077.47               | 0.989       | 744.71                | 0.993       | 1077.80               | 0.991       | 745.19                | 0.996       | 1077.61               | 0.993       | 744.92                | 0.996       |
| (8,4)           | 1126.88               | 0.952       | 600.21                | 0.950       | 1126.58               | 0.941       | 601.14                | 0.981       | 1126.34               | 0.972       | 600.18                | 0.984       |
| (9,4)           | 1128.13               | 0.994       | 730.71                | 0.999       | 1128.06               | 0.995       | 731.11                | 0.997       | 1128.12               | 0.997       | 731.04                | 0.999       |
| (7,6)           | 1134.76               | 0.989       | 659.30                | 0.989       | 1134.99               | 0.989       | 659.55                | 0.992       | 1134.86               | 0.993       | 659.42                | 0.987       |
| (8,6)           | 1195.97               | 0.992       | 726.81                | 0.998       | 1196.08               | 0.994       | 726.93                | 0.996       | 1196.07               | 0.996       | 727.00                | 0.998       |
| (9,5)           | 1258.10               | 0.935       | 685.02                | 0.968       | 1258.35               | 0.952       | 685.09                | 0.988       | 1258.58               | 0.947       | 684.89                | 0.988       |
| (10,3)          | 1262.17               | 0.782       | 651.37                | 0.464       | 1261.76               | 0.875       | 651.33                | 0.202       | 1262.43               | 0.887       | 652.10                | 0.292       |
| (10,5)          | 1277.61               | 0.933       | 799.74                | 0.941       | 1277.92               | 0.929       | 799.66                | 0.911       | 1278.28               | 0.955       | 799.50                | 0.969       |
| (8,7)           | 1282.34               | 0.920       | 740.21                | 0.973       | 1282.79               | 0.913       | 740.94                | 0.987       | 1283.36               | 0.929       | 740.35                | 0.971       |

| Chirality (n,m) | $\lambda_{11}$ (nm) 4 | Fit $R^2$ 4 | $\lambda_{22}$ (nm) 4 | Fit $R^2$ 4 | $\lambda_{11}$ (nm) 5 | Fit $R^2$ 5 | $\lambda_{22}$ (nm) 5 | Fit $R^2$ 5 |
|-----------------|-----------------------|-------------|-----------------------|-------------|-----------------------|-------------|-----------------------|-------------|
| (8,3)           | 970.68                | 0.984       | 673.58                | 0.997       | 970.90                | 0.979       | 673.96                | 0.990       |
| (6,5)           | 984.96                | 0.960       | 579.11                | 0.881       | 985.11                | 0.971       | 578.68                | 0.968       |
| (7,5)           | 1044.49               | 0.985       | 652.96                | 0.992       | 1044.56               | 0.988       | 653.28                | 0.986       |
| (10,2)          | 1077.51               | 0.990       | 745.04                | 0.998       | 1077.59               | 0.992       | 745.52                | 0.996       |
| (8,4)           | 1126.50               | 0.951       | 600.35                | 0.985       | 1126.75               | 0.953       | 600.87                | 0.974       |
| (9,4)           | 1128.02               | 0.996       | 730.82                | 0.998       | 1128.35               | 0.997       | 731.19                | 0.998       |
| (7,6)           | 1134.89               | 0.991       | 659.35                | 0.994       | 1135.10               | 0.991       | 659.75                | 0.995       |
| (8,6)           | 1196.05               | 0.996       | 726.96                | 0.999       | 1196.17               | 0.996       | 727.09                | 0.999       |

|        |         |       |        |       |         |       |        |       |
|--------|---------|-------|--------|-------|---------|-------|--------|-------|
| (9,5)  | 1258.21 | 0.952 | 684.93 | 0.992 | 1258.55 | 0.956 | 684.74 | 0.995 |
| (10,3) | 1262.27 | 0.944 | 649.91 | 0.626 | 1263.09 | 0.894 | 648.94 | 0.918 |
| (10,5) | 1277.82 | 0.944 | 799.33 | 0.972 | 1278.06 | 0.942 | 799.45 | 0.938 |
| (8,7)  | 1283.11 | 0.951 | 740.11 | 0.988 | 1283.37 | 0.946 | 740.79 | 0.988 |

**Table S3.** Fitted  $\lambda_{11}$  and  $\lambda_{22}$  values, along with goodness of fit values (adjusted  $R^2$ ), as a function of chirality, for ss(AT)<sub>15</sub>-HiPco nanotubes on the surface of adherent NIH/3T3 cells.

| Chirality (n,m) | $\lambda_{11}$ (nm) 1 | Fit $R^2$ 1 | $\lambda_{22}$ (nm) 1 | Fit $R^2$ 1 | $\lambda_{11}$ (nm) 2 | Fit $R^2$ 2 | $\lambda_{22}$ (nm) 2 | Fit $R^2$ 2 | $\lambda_{11}$ (nm) 3 | Fit $R^2$ 3 | $\lambda_{22}$ (nm) 3 | Fit $R^2$ 3 |
|-----------------|-----------------------|-------------|-----------------------|-------------|-----------------------|-------------|-----------------------|-------------|-----------------------|-------------|-----------------------|-------------|
| (8,3)           | 972.48                | 0.971       | 672.65                | 0.969       | 972.45                | 0.978       | 671.88                | 0.969       | 972.94                | 0.982       | 672.73                | 0.995       |
| (6,5)           | 985.96                | 0.935       | 578.04                | 0.933       | 986.02                | 0.890       | 578.23                | 0.952       | 986.60                | 0.976       | 577.36                | 0.979       |
| (7,5)           | 1046.28               | 0.980       | 652.95                | 0.972       | 1046.55               | 0.975       | 653.08                | 0.968       | 1046.18               | 0.991       | 652.65                | 0.992       |
| (10,2)          | 1079.49               | 0.968       | 745.84                | 0.984       | 1080.12               | 0.984       | 746.13                | 0.993       | 1079.01               | 0.983       | 746.10                | 0.994       |
| (8,4)           | 1128.03               | 0.930       | 599.03                | 0.969       | 1128.18               | 0.955       | 600.09                | 0.968       | 1128.39               | 0.979       | 599.44                | 0.990       |
| (9,4)           | 1130.24               | 0.990       | 731.54                | 0.991       | 1130.42               | 0.991       | 731.50                | 0.996       | 1130.21               | 0.994       | 731.34                | 0.993       |
| (7,6)           | 1136.22               | 0.975       | 659.81                | 0.983       | 1136.92               | 0.981       | 659.42                | 0.990       | 1135.93               | 0.991       | 658.80                | 0.993       |
| (8,6)           | 1198.31               | 0.988       | 727.34                | 0.977       | 1198.80               | 0.990       | 727.64                | 0.994       | 1198.40               | 0.996       | 727.41                | 0.997       |
| (9,5)           | 1261.27               | 0.938       | 684.19                | 0.964       | 1261.72               | 0.935       | 685.36                | 0.993       | 1262.01               | 0.950       | 682.84                | 0.985       |
| (10,3)          | 1266.42               | 0.748       | 646.82                | 0.902       | 1265.69               | 0.919       | 648.15                | 0.857       | 1265.44               | 0.960       | 646.61                | 0.935       |
| (10,5)          | 1280.72               | 0.898       | 799.90                | 0.923       | 1281.64               | 0.958       | 800.91                | 0.980       | 1280.51               | 0.960       | 798.84                | 0.968       |
| (8,7)           | 1285.88               | 0.870       | 740.86                | 0.969       | 1286.66               | 0.926       | 741.85                | 0.974       | 1285.15               | 0.951       | 740.56                | 0.982       |

| Chirality (n,m) | $\lambda_{11}$ (nm) 4 | Fit $R^2$ 4 | $\lambda_{22}$ (nm) 4 | Fit $R^2$ 4 | $\lambda_{11}$ (nm) 5 | Fit $R^2$ 5 | $\lambda_{22}$ (nm) 5 | Fit $R^2$ 5 |
|-----------------|-----------------------|-------------|-----------------------|-------------|-----------------------|-------------|-----------------------|-------------|
| (8,3)           | 972.68                | 0.984       | 673.49                | 0.983       | 972.71                | 0.981       | 673.10                | 0.981       |
| (6,5)           | 986.51                | 0.958       | 578.06                | 0.947       | 986.37                | 0.979       | 577.13                | 0.990       |
| (7,5)           | 1046.44               | 0.989       | 653.24                | 0.993       | 1046.22               | 0.992       | 653.36                | 0.995       |
| (10,2)          | 1079.47               | 0.984       | 746.42                | 0.988       | 1079.23               | 0.984       | 746.30                | 0.991       |

|        |         |       |        |       |         |       |        |       |
|--------|---------|-------|--------|-------|---------|-------|--------|-------|
| (8,4)  | 1127.99 | 0.960 | 600.04 | 0.956 | 1128.25 | 0.979 | 599.29 | 0.985 |
| (9,4)  | 1130.18 | 0.993 | 731.75 | 0.994 | 1130.11 | 0.995 | 731.47 | 0.998 |
| (7,6)  | 1136.46 | 0.986 | 660.09 | 0.994 | 1136.20 | 0.990 | 659.45 | 0.992 |
| (8,6)  | 1198.52 | 0.995 | 727.83 | 0.996 | 1198.40 | 0.996 | 727.60 | 0.997 |
| (9,5)  | 1261.80 | 0.945 | 684.74 | 0.988 | 1261.82 | 0.969 | 684.22 | 0.979 |
| (10,3) | 1265.45 | 0.941 | 649.16 | 0.874 | 1265.45 | 0.964 | 648.59 | 0.907 |
| (10,5) | 1281.08 | 0.953 | 800.51 | 0.991 | 1280.97 | 0.969 | 800.24 | 0.990 |
| (8,7)  | 1286.50 | 0.977 | 741.93 | 0.978 | 1285.75 | 0.962 | 740.92 | 0.987 |

**Table S4.** Fitted  $\lambda_{11}$  and  $\lambda_{22}$  values, along with goodness of fit values (adjusted  $R^2$ ), as a function of chirality, for ss(AT)<sub>15</sub>-HiPco nanotubes on the surface Jurkat cells.

| Chirality (n,m) | $\lambda_{11}$ (nm) 1 | Fit $R^2$ 1 | $\lambda_{22}$ (nm) 1 | Fit $R^2$ 1 | $\lambda_{11}$ (nm) 2 | Fit $R^2$ 2 | $\lambda_{22}$ (nm) 2 | Fit $R^2$ 2 | $\lambda_{11}$ (nm) 3 | Fit $R^2$ 3 | $\lambda_{22}$ (nm) 3 | Fit $R^2$ 3 |
|-----------------|-----------------------|-------------|-----------------------|-------------|-----------------------|-------------|-----------------------|-------------|-----------------------|-------------|-----------------------|-------------|
| (8,3)           | 973.41                | 0.993       | 673.97                | 0.993       | 973.45                | 0.992       | 673.69                | 0.998       | 973.54                | 0.993       | 673.69                | 0.999       |
| (6,5)           | 987.21                | 0.985       | 578.36                | 0.990       | 987.10                | 0.993       | 576.89                | 0.998       | 987.14                | 0.995       | 577.18                | 0.995       |
| (7,5)           | 1047.35               | 0.993       | 652.94                | 0.993       | 1047.29               | 0.995       | 652.93                | 0.996       | 1047.37               | 0.994       | 653.38                | 0.996       |
| (10,2)          | 1080.09               | 0.987       | 745.81                | 0.995       | 1080.02               | 0.986       | 746.17                | 0.997       | 1080.07               | 0.986       | 745.87                | 0.996       |
| (8,4)           | 1129.29               | 0.975       | 601.29                | 0.993       | 1129.59               | 0.982       | 600.13                | 0.996       | 1129.74               | 0.981       | 599.89                | 0.993       |
| (9,4)           | 1131.13               | 0.999       | 731.82                | 0.999       | 1131.30               | 0.999       | 731.83                | 0.999       | 1131.42               | 0.999       | 731.54                | 0.997       |
| (7,6)           | 1137.25               | 0.997       | 659.49                | 0.998       | 1137.44               | 0.998       | 659.42                | 0.996       | 1137.53               | 0.999       | 659.88                | 0.996       |
| (8,6)           | 1199.56               | 0.998       | 727.87                | 0.999       | 1199.42               | 0.999       | 727.83                | 0.999       | 1199.48               | 0.999       | 727.67                | 0.998       |
| (9,5)           | 1262.10               | 0.979       | 686.59                | 0.993       | 1262.10               | 0.981       | 685.48                | 0.994       | 1262.17               | 0.983       | 685.22                | 0.999       |
| (10,3)          | 1267.10               | 0.938       | 648.27                | 0.971       | 1266.99               | 0.945       | 648.07                | 0.979       | 1267.04               | 0.946       | 648.70                | 0.951       |
| (10,5)          | 1282.47               | 0.987       | 800.75                | 0.990       | 1282.35               | 0.984       | 800.70                | 0.986       | 1282.35               | 0.985       | 801.21                | 0.989       |
| (8,7)           | 1287.97               | 0.988       | 741.43                | 0.994       | 1287.47               | 0.986       | 741.51                | 0.994       | 1287.56               | 0.988       | 740.96                | 0.990       |

**Table S5.** Fitted  $\lambda_{11}$  and  $\lambda_{22}$  values, along with goodness of fit values (adjusted  $R^2$ ), as a function of chirality, for ss(AT)<sub>15</sub>-HiPco nanotubes on the surface of trypsinized HeLa cells in suspension.

| Chirality<br>(n,m) | $\lambda_{11}$<br>(nm)<br>1 | Fit<br>$R^2$<br>1 | $\lambda_{22}$<br>(nm)<br>1 | Fit<br>$R^2$<br>1 | $\lambda_{11}$<br>(nm)<br>2 | Fit<br>$R^2$<br>2 | $\lambda_{22}$<br>(nm)<br>2 | Fit<br>$R^2$<br>2 | $\lambda_{11}$<br>(nm)<br>3 | Fit<br>$R^2$<br>3 | $\lambda_{22}$<br>(nm)<br>3 | Fit<br>$R^2$<br>3 |
|--------------------|-----------------------------|-------------------|-----------------------------|-------------------|-----------------------------|-------------------|-----------------------------|-------------------|-----------------------------|-------------------|-----------------------------|-------------------|
| (8,3)              | 973.98                      | 0.992             | 674.15                      | 0.993             | 973.99                      | 0.990             | 674.08                      | 0.996             | 973.96                      | 0.989             | 674.39                      | 0.996             |
| (6,5)              | 987.90                      | 0.981             | 577.09                      | 0.993             | 987.89                      | 0.982             | 577.33                      | 0.992             | 987.89                      | 0.982             | 577.00                      | 0.982             |
| (7,5)              | 1048.11                     | 0.989             | 653.44                      | 0.995             | 1048.08                     | 0.990             | 653.36                      | 0.999             | 1048.08                     | 0.990             | 653.43                      | 0.998             |
| (10,2)             | 1081.05                     | 0.987             | 746.71                      | 0.996             | 1081.11                     | 0.985             | 746.70                      | 0.995             | 1081.09                     | 0.985             | 746.81                      | 0.994             |
| (8,4)              | 1130.44                     | 0.944             | 600.15                      | 0.977             | 1130.47                     | 0.964             | 600.53                      | 0.988             | 1130.43                     | 0.944             | 600.00                      | 0.996             |
| (9,4)              | 1132.26                     | 0.996             | 731.91                      | 0.998             | 1132.27                     | 0.996             | 731.73                      | 0.997             | 1132.28                     | 0.996             | 731.85                      | 0.999             |
| (7,6)              | 1138.79                     | 0.992             | 660.21                      | 0.998             | 1138.83                     | 0.993             | 660.25                      | 0.998             | 1138.85                     | 0.992             | 660.27                      | 0.999             |
| (8,6)              | 1200.50                     | 0.995             | 727.96                      | 0.999             | 1200.48                     | 0.996             | 727.61                      | 0.999             | 1200.48                     | 0.995             | 728.06                      | 0.991             |
| (9,5)              | 1262.63                     | 0.971             | 686.12                      | 0.990             | 1262.61                     | 0.968             | 686.00                      | 0.993             | 1262.76                     | 0.957             | 686.27                      | 0.997             |
| (10,3)             | 1268.30                     | 0.860             | 649.43                      | 0.924             | 1268.32                     | 0.860             | 650.19                      | 0.947             | 1268.32                     | 0.856             | 650.18                      | 0.909             |
| (10,5)             | 1284.00                     | 0.977             | 801.47                      | 0.988             | 1284.06                     | 0.979             | 801.13                      | 0.995             | 1284.17                     | 0.975             | 801.21                      | 0.990             |
| (8,7)              | 1290.29                     | 0.975             | 741.86                      | 0.994             | 1290.37                     | 0.975             | 741.91                      | 0.994             | 1290.36                     | 0.971             | 742.09                      | 0.996             |

**Table S6.** Fitted  $\lambda_{11}$  and  $\lambda_{22}$  values, along with goodness of fit values (adjusted  $R^2$ ), as a function of chirality, for ss(AT)<sub>15</sub>-HiPco nanotubes on the surface of trypsinized NIH/3T3 cells in suspension.

| Chirality (n,m) | $\lambda_{11}$ (nm) 1 | Fit $R^2$ 1 | $\lambda_{22}$ (nm) 1 | Fit $R^2$ 1 | $\lambda_{11}$ (nm) 2 | Fit $R^2$ 2 | $\lambda_{22}$ (nm) 2 | Fit $R^2$ 2 | $\lambda_{11}$ (nm) 3 | Fit $R^2$ 3 | $\lambda_{22}$ (nm) 3 | Fit $R^2$ 3 |
|-----------------|-----------------------|-------------|-----------------------|-------------|-----------------------|-------------|-----------------------|-------------|-----------------------|-------------|-----------------------|-------------|
| (8,3)           | 974.00                | 0.989       | 674.20                | 0.995       | 974.01                | 0.989       | 674.08                | 0.997       | 973.97                | 0.989       | 674.17                | 0.997       |
| (6,5)           | 987.94                | 0.982       | 576.98                | 0.993       | 988.06                | 0.982       | 577.07                | 0.988       | 987.86                | 0.985       | 577.28                | 0.988       |
| (7,5)           | 1048.07               | 0.987       | 653.69                | 0.996       | 1048.08               | 0.987       | 653.41                | 0.992       | 1048.02               | 0.987       | 653.51                | 0.997       |
| (10,2)          | 1081.07               | 0.985       | 746.54                | 0.996       | 1081.11               | 0.987       | 746.53                | 0.994       | 1081.08               | 0.985       | 746.62                | 0.994       |
| (8,4)           | 1130.48               | 0.955       | 599.94                | 0.993       | 1130.40               | 0.949       | 599.88                | 0.969       | 1130.34               | 0.951       | 599.96                | 0.992       |
| (9,4)           | 1132.27               | 0.995       | 731.67                | 0.999       | 1132.29               | 0.995       | 731.59                | 0.997       | 1132.29               | 0.995       | 731.87                | 0.998       |
| (7,6)           | 1138.77               | 0.990       | 660.11                | 0.999       | 1138.81               | 0.992       | 660.15                | 0.998       | 1138.83               | 0.989       | 660.20                | 0.996       |
| (8,6)           | 1200.53               | 0.995       | 727.64                | 0.999       | 1200.53               | 0.994       | 727.62                | 0.999       | 1200.53               | 0.995       | 727.99                | 0.998       |
| (9,5)           | 1263.01               | 0.957       | 685.84                | 0.997       | 1262.82               | 0.971       | 686.10                | 0.990       | 1262.96               | 0.963       | 686.28                | 0.996       |
| (10,3)          | 1268.31               | 0.857       | 650.20                | 0.966       | 1268.26               | 0.887       | 649.37                | 0.891       | 1268.46               | 0.866       | 649.49                | 0.880       |
| (10,5)          | 1284.03               | 0.978       | 801.22                | 0.985       | 1284.12               | 0.978       | 801.25                | 0.993       | 1284.09               | 0.979       | 801.38                | 0.991       |
| (8,7)           | 1290.15               | 0.970       | 741.69                | 0.991       | 1290.29               | 0.976       | 741.73                | 0.991       | 1290.31               | 0.970       | 741.85                | 0.994       |

**Table S7.** Fitted  $\lambda_{11}$  and  $\lambda_{22}$  values, along with goodness of fit values (adjusted  $R^2$ ), as a function of chirality, for ss(AT)<sub>15</sub>-HiPco nanotubes on the surface of trypsinized Jurkat cells in suspension.

| Chirality (n,m) | $\lambda_{11}$ (nm) 1 | Fit $R^2$ 1 | $\lambda_{22}$ (nm) 1 | Fit $R^2$ 1 | $\lambda_{11}$ (nm) 2 | Fit $R^2$ 2 | $\lambda_{22}$ (nm) 2 | Fit $R^2$ 2 | $\lambda_{11}$ (nm) 3 | Fit $R^2$ 3 | $\lambda_{22}$ (nm) 3 | Fit $R^2$ 3 |
|-----------------|-----------------------|-------------|-----------------------|-------------|-----------------------|-------------|-----------------------|-------------|-----------------------|-------------|-----------------------|-------------|
| (8,3)           | 973.82                | 0.992       | 674.36                | 0.998       | 973.98                | 0.991       | 673.94                | 0.996       | 974.01                | 0.991       | 673.87                | 0.996       |
| (6,5)           | 987.76                | 0.986       | 577.87                | 0.993       | 987.82                | 0.991       | 577.12                | 0.996       | 987.80                | 0.994       | 577.37                | 0.996       |
| (7,5)           | 1047.71               | 0.992       | 653.72                | 0.995       | 1047.81               | 0.992       | 653.32                | 0.995       | 1047.82               | 0.993       | 653.49                | 0.995       |
| (10,2)          | 1080.56               | 0.987       | 745.72                | 0.998       | 1080.60               | 0.986       | 745.92                | 0.997       | 1080.60               | 0.985       | 745.44                | 0.996       |
| (8,4)           | 1129.72               | 0.970       | 600.69                | 0.996       | 1130.34               | 0.975       | 599.78                | 0.991       | 1130.44               | 0.976       | 600.41                | 0.995       |
| (9,4)           | 1131.60               | 0.999       | 731.13                | 0.998       | 1131.96               | 0.999       | 731.39                | 0.999       | 1132.05               | 0.999       | 731.11                | 0.999       |
| (7,6)           | 1137.82               | 0.997       | 660.36                | 0.995       | 1138.19               | 0.998       | 659.79                | 0.998       | 1138.25               | 0.999       | 660.16                | 0.997       |

|        |         |       |        |       |         |       |        |       |         |       |        |       |
|--------|---------|-------|--------|-------|---------|-------|--------|-------|---------|-------|--------|-------|
| (8,6)  | 1199.97 | 0.998 | 727.33 | 0.999 | 1200.03 | 0.999 | 727.40 | 0.999 | 1200.03 | 0.999 | 727.26 | 0.999 |
| (9,5)  | 1262.81 | 0.974 | 686.17 | 0.999 | 1262.96 | 0.977 | 685.15 | 0.997 | 1263.01 | 0.978 | 685.86 | 0.993 |
| (10,3) | 1267.63 | 0.947 | 650.34 | 0.921 | 1267.70 | 0.954 | 648.97 | 0.935 | 1267.72 | 0.959 | 649.09 | 0.979 |
| (10,5) | 1283.01 | 0.983 | 801.58 | 0.978 | 1282.97 | 0.981 | 801.23 | 0.990 | 1282.96 | 0.982 | 800.95 | 0.989 |
| (8,7)  | 1288.45 | 0.985 | 740.61 | 0.991 | 1288.27 | 0.988 | 740.87 | 0.997 | 1288.02 | 0.985 | 739.72 | 0.985 |

### References:

- 1 DeRose, P. C. & Resch-Genger, U. Recommendations for Fluorescence Instrument Qualification: The New ASTM Standard Guide. *Anal. Chem.* **2010**, *82*, 2129-2133.
- 2 Barretina, J.; Caponigro, G; Stransky, N.; Venkatesan, K.; Margolin, A.; Kim, S.; Wilson, C.J.; Lehár, J.; Kryukov, G.V.; Sonkin, D. *et al.* The Cancer Cell Line Encyclopedia Enables Predictive Modelling of Anticancer Drug Sensitivity. *Nature*, **2012**, *483*, 603-307.
